# Supplementary material for: Bayesian group sequential designs for phase III emergency medicine trials: a case study using the PARAMEDIC2 trial
Source: PubMed Central journal article supplement (PMC6961266; doi:10.1186/s13063-019-4024-x), 2020-01-14
Supplement: 13063_2019_4024_MOESM2_ESM.pdf [file 13063_2019_4024_MOESM2_ESM.pdf]

## Additional File 2 - Incorporating prior information

One of the advantages of the Bayesian approach is the ability to formally incorporate information from previous studies and/or the opinions of clinicians. There were a number of sources available from which we could construct informative priors and compare the influence of these different priors on the designs' operating characteristics.

At the time that the PARAMEDIC2 trial was being designed, there was only one previous RCT that compared the use of adrenaline to placebo in out of hospital cardiac arrest patients – the PACA trial [1]. This trial found the survival to hospital discharge to be 4% and 1.9% in the adrenaline and placebo arms, respectively. There were also a number of studies that compared standard dose (1mg) adrenaline (control) to high dose adrenaline or vasopressin (intervention), and so the results from the standard adrenaline dose arm could be used to derive prior distributions for the adrenaline arm in the Bayesian designs (see Table A2.1). A number of observational studies had also been performed which compared the use of adrenaline to not using adrenaline for out of hospital cardiac arrest patients (see Table A2.2). Some of the studies reported survival to discharge rather than 30-day survival, and so it was assumed that these rates were similar.

**Table A2.1 Previous RCTs investigating the use of standard dose (1mg) adrenaline to high dose adrenaline or vasopressin**

| Study                 | Standard dose adrenaline survival to discharge/30 day survival | Comparator                | Setting                                               |
|-----------------------|----------------------------------------------------------------|---------------------------|-------------------------------------------------------|
| Brown et al. [2]      | 26/632 (4.1%)                                                  | High dose adrenaline      | OHCA                                                  |
| Callaham et al. [3]   | 3/270 (1.1%)                                                   | High dose adrenaline      | OHCA (non-trauma)                                     |
| Gueugniaud et al. [4] | 46/1650 (2.8%)                                                 | High dose adrenaline      | OHCA (non-trauma)                                     |
| Sherman et al. [5]    | 0/62 (0%)                                                      | High dose adrenaline      | OHCA (non-trauma), on arrival<br>Emergency department |
| Steill et al. [6]     | 2/165 (1.2%)                                                   | High dose adrenaline      | IHCA/OHCA                                             |
| Jacobs et al. [1]     | 11/272 (4.0%)                                                  | Placebo                   | OHCA                                                  |
| Ducros et al. [7]     | 2/16 (12.5%)                                                   | Vasopressin/Epinephrine   | Witnessed OCHA                                        |
| Gueugniaud et al. [8] | 33/1452 (2.3%)                                                 | Vasopressin / Epinephrine | OHCA (non-trauma)                                     |
| Lindner et al. [9]    | 3/20 (15.0%)                                                   | Vasopressin / Epinephrine | OHCA, Refractory VF                                   |
| Ong et al. [10]       | 8/353 (2.3%)                                                   | Vasopressin / Epinephrine | Emergency department                                  |
| Wenzel et al. [11]    | 58/597 (9.7%)                                                  | Vasopressin / Epinephrine | OHCA (non-trauma)                                     |

OHCA = out of hospital cardiac arrest; IHCA = in hospital cardiac arrest; VF = ventricular fibrillation

**Table A2.2 Previous observational studies on the use of adrenaline for out of hospital cardiac arrests**

| Study                   | Adrenaline survival to discharge/30 day survival | No adrenaline survival to discharge/30 day survival |
|-------------------------|--------------------------------------------------|-----------------------------------------------------|
| Hagihara et al. [12]    | 805/15030 (5.4%)                                 | 18906/402158 (4.7%)                                 |
| Holmberg et al. [13]    | 156/4566 (3.4%)                                  | 388/6207 (6.3%)                                     |
| Kirves et al. [14]*     | 29/77 (38%)                                      | 60/80 (75%)                                         |
| Olasveengen et al. [15] | 24/367 (7%)                                      | 60/481 (13%)                                        |
| Ong et al. [16]         | 11/681 (1.6%)                                    | 6/615 (1%)                                          |
| Vayrynen et al. [17]    | 39/703 (5.5%)                                    | 18/86 (20.9%)                                       |

|                     |                  |                |
|---------------------|------------------|----------------|
| Hayashi et al. [18] | 137/1013 (13.5%) | 258/2148 (12%) |
| Herlitz et al. [19] | 50/417 (12%)     | 149/786 (19%)  |

\*These survival rates were much higher than the other studies and were not included in the derivation of the prior distributions

We also asked the PARAMEDIC2 investigator clinicians for their opinions on plausible rates of the primary outcome and they believed that a mean 30-day survival rate of 3% should be used, and that a rate above 8% would not be plausible (for either arm).

Since survival at 30 days is a binary variable, we used the Bernoulli distribution to model the primary outcome for each arm:

$$Y_j|t \sim \text{Bernoulli}(P_t)$$

where  $Y_j$  is the 30-day survival status for patient  $j$  and  $P_t$  is the probability distribution for the 30-day survival rate for arm  $t$ . Since this is a Bayesian approach, we need prior distributions for  $P_t$ .

In FACTS, normal distributions were used for the priors for the log-odds of the 30-day survival rate for each arm  $t$  ( $t$ =adrenaline, placebo),  $\theta_t = \log\left(\frac{P_t}{1-P_t}\right)$ . The 30-day survival rate for arm  $t$ ,  $P_t$ , is modelled as:

$P_t = \frac{e^{\theta_t}}{1+e^{\theta_t}}$ , where  $\theta_t \sim N(\mu_t, v_t^2)$ ,  $\mu_t$  is the mean rate for arm  $t$  (on the log-odds scale), and  $v_t^2$  is the variance.

Using the results from previous studies, as well as the opinions of the PARAMEDIC2 clinicians, we were able to derive a number of prior distributions to conduct a prior sensitivity analysis. These are described in Table A2.3.

**Table A2.3. Prior distributions for Bayesian group sequential designs for PARAMEDIC2**

| Prior                                | Mean 30-day survival rate adrenaline | $\mu_{adrenaline}$ , $v_{adrenaline}^2$ | Approximate no. observations in adrenaline arm prior | Mean 30-day survival rate placebo | $\mu_{placebo}$ , $v_{placebo}^2$ | Approximate no. observations in placebo arm prior |
|--------------------------------------|--------------------------------------|-----------------------------------------|------------------------------------------------------|-----------------------------------|-----------------------------------|---------------------------------------------------|
| <b>Original prior (P1)</b>           | 7%                                   | -2.7, 0.5 <sup>2</sup>                  | 65                                                   | 7%                                | -2.7, 0.5 <sup>2</sup>            | 65                                                |
| <b>Clinician informed prior (P2)</b> | 3%                                   | -3.5, 0.55 <sup>2</sup>                 | 107                                                  | 3%                                | -3.5, 0.55 <sup>2</sup>           | 107                                               |

|                                                      |      |                         |     |      |                         |      |
|------------------------------------------------------|------|-------------------------|-----|------|-------------------------|------|
| <b>PACA trial [1] prior (P3)</b>                     | 4%   | -3.2, 0.2 <sup>2</sup>  | 660 | 2%   | -3.9, 0.14 <sup>2</sup> | 2580 |
| <b>Vaguer PACA trial [1] prior (P4)</b>              | 4%   | -3.2, 0.8 <sup>2</sup>  | 35  | 2%   | -3.9, 0.8 <sup>2</sup>  | 67   |
| <b>Previous adrenaline RCTS (placebo worse) (P5)</b> | 3.5% | -3.3, 0.8 <sup>2</sup>  | 39  | 2%   | -3.9, 0.8 <sup>2</sup>  | 66   |
| <b>Previous adrenaline RCTS (placebo same) (P6)</b>  | 3.5% | -3.3, 0.8 <sup>2</sup>  | 39  | 3.5% | -3.3, 0.8 <sup>2</sup>  | 39   |
| <b>Observational studies (P7)</b>                    | 7%   | -2.8, 0.78 <sup>2</sup> | 27  | 8%   | -2.4, 1.1 <sup>2</sup>  | 9    |

The original prior (P1, Table A2.3), that was used throughout the main manuscript, was centred on the original estimates of 30 day survival at approximately 7%, and had a variance that produced a 95% Credible Interval (CrI) of 2-15% on the 30-day survival rate. The clinician informed prior (P2) had a mean survival rate of 3% and a variance that produced a 95% CrI of 1-8% on the 30-day survival rate.

The results from the PACA trial [1] were used to inform the mean and variance for the “PACA trial prior” (P3). These values were derived from the trial sample proportions and their standard error. Priors were also run with larger variances since the standard errors derived from the PACA trial were quite small – this is the “Vaguer PACA trial prior” (P4).

The weighted mean survival to discharge of the previous RCTs that used standard dose adrenaline as the control (Table A2.1) was 3.5%, and so this was used as the mean for the prior. The variance was chosen to ensure the upper limit of the 95% CrI covered the range of survival rates in the studies. These studies only had information on the adrenaline arm, and so one set of priors was run assuming placebo was worse, with a mean of 2%, and a variance that produced an upper limit of 5% for a 95% CrI on the 30-day survival rate (P5). Another set of priors were run assuming the placebo arm had the same prior as the adrenaline arm (P6).

Priors were derived from the observational studies (Table A2.2) using the mean of the sample proportions across the studies and variance of the proportions for each arm (P7). The Kirves et al. [14] results were not included as these results were very different to the other studies.

Separate simulations were run with each prior listed in Table A2.3 for the designs from Table 1 in the main paper and the results are displayed in Tables A2.4-A2.6 and Figures A2.1-A2.3.

For each Bayesian design, the PACA prior (P3) produced very high simulated type I error rates and

generally had lower power for the “adrenaline harmful” scenarios, compared to the other priors. The PACA prior had much higher power when adrenaline was assumed to have a survival rate 1% higher than placebo, and had similar power to the other priors when adrenaline was assumed to have a survival rate that was 2% higher than placebo. These operating characteristics were produced because this prior was strongly informative and in favour of adrenaline. The average sample size for the PACA prior was also much smaller for the “adrenaline superior” scenarios, and the null scenarios.

The other priors produced similar power to the original prior (P1). The following priors tended to produce smaller average sample sizes than the original prior: clinician prior (P2); priors based on previous RCTs of adrenaline where the placebo arm was assumed to have the same prior as the adrenaline arm (P6); observational studies prior (P7). The vaguer PACA prior (P4) produced smaller average sample sizes for the adrenaline superior scenarios, and similar average sample sizes for the other scenarios compared to the original prior. The priors based on previous adrenaline RCTs where placebo was assumed to perform worse than adrenaline (P5) had higher average sample sizes compared to the original prior for the adrenaline harmful scenarios, and smaller average sample sizes for the adrenaline superior scenarios

For designs B1 and B3, when a survival of 6% was assumed, under the null scenario, priors P2-P7 produced a type I error that was larger than the targeted 5%. When a survival of 3% was assumed for these designs, priors P3-P5 produced a type I error >5% under the null scenario. Only prior P3 produced a type I error >5% under the null scenario when a survival of 2% was assumed for designs B1 and B3.

For design B2, when a survival of 6% or 3% was assumed, under the null scenario, priors P2-P7 produced a type I error that was larger than the targeted 5%. When a survival of 2% was assumed, priors P3-P7 produced a type I error rate that was >5% under the null scenario.

**Table A2.4 Prior sensitivity analysis for the Bayesian designs (Design B1)**

|                                          | Original prior (P1) |                            | Clinician prior (P2) |                            | PACA prior (P3)     |                            | PACA prior (vagner) (P4) |                            | RCT prior (pbo worse) (P5) |                            | RCT prior (pbo same) (P6) |                            | Observational studies (P7) |                            |
|------------------------------------------|---------------------|----------------------------|----------------------|----------------------------|---------------------|----------------------------|--------------------------|----------------------------|----------------------------|----------------------------|---------------------------|----------------------------|----------------------------|----------------------------|
|                                          | Average sample size | Prop. declaring difference | Average sample size  | Prop. declaring difference | Average sample size | Prop. declaring difference | Average sample size      | Prop. declaring difference | Average sample size        | Prop. declaring difference | Average sample size       | Prop. declaring difference | Average sample size        | Prop. declaring difference |
| <b>Null: Placebo 6% vs Adrenaline 6%</b> | 7968<br>(390)       | 0.0493                     | 7960<br>(454)        | 0.0511                     | 2988<br>(3141)      | 0.7985                     | 7941<br>(573)            | 0.0549                     | 7915<br>(718)              | 0.0598                     | 7955<br>(490)             | 0.0528                     | 7954<br>(488)              | 0.0535                     |
| <b>Placebo 8% vs Adrenaline 6%</b>       | 6100<br>(2075)      | 0.935                      | 6096<br>(2146)       | 0.937                      | 5574<br>(3487)      | 0.557                      | 6203<br>(2087)           | 0.931                      | 6483<br>(1949)             | 0.909                      | 6052<br>(2160)            | 0.935                      | 5963<br>(2193)             | 0.939                      |
| <b>Placebo 6% vs Adrenaline 8%</b>       | 6019<br>(2107)      | 0.928                      | 5896<br>(2197)       | 0.93                       | 814<br>(686)        | 1                          | 5659<br>(2265)           | 0.938                      | 5151<br>(2460)             | 0.954                      | 5929<br>(2170)            | 0.932                      | 5981<br>(2139)             | 0.928                      |
| <b>Placebo 7% vs Adrenaline 6%</b>       | 7676<br>(1149)      | 0.431                      | 7667<br>(1158)       | 0.426                      | 4492<br>(3606)      | 0.504                      | 7667<br>(1172)           | 0.415                      | 7752<br>(997)              | 0.364                      | 7637<br>(1192)            | 0.429                      | 7637<br>(1214)             | 0.436                      |
| <b>Placebo 6% vs Adrenaline 7%</b>       | 7654<br>(1174)      | 0.433                      | 7592<br>(1265)       | 0.441                      | 1341<br>(1601)      | 0.992                      | 7497<br>(1437)           | 0.467                      | 7321<br>(1669)             | 0.513                      | 7637<br>(1205)            | 0.439                      | 7631<br>(1212)             | 0.427                      |
| <b>Null: Placebo 3% vs Adrenaline 3%</b> | 7980<br>(293)       | 0.044                      | 7973<br>(365)        | 0.0477                     | 5696<br>(3212)      | 0.4913                     | 7956<br>(462)            | 0.0526                     | 7955<br>(473)              | 0.0538                     | 7967<br>(397)             | 0.0416                     | 7966<br>(401)              | 0.0499                     |
| <b>Placebo 5% vs Adrenaline 3%</b>       | 4842<br>(1985)      | 0.994                      | 4619<br>(1945)       | 0.996                      | 7258<br>(2204)      | 0.736                      | 4768<br>(2009)           | 0.99                       | 5042<br>(2002)             | 0.989                      | 4577<br>(2026)            | 0.994                      | 4626<br>(2014)             | 0.994                      |
| <b>Placebo 3% vs Adrenaline 5%</b>       | 4546<br>(1960)      | 0.995                      | 4395<br>(1982)       | 0.995                      | 1091<br>(794)       | 1                          | 4082<br>(2015)           | 0.996                      | 3874<br>(2021)             | 0.996                      | 4349<br>(2044)            | 0.994                      | 4323<br>(1997)             | 0.996                      |
| <b>Placebo 4% vs Adrenaline 3%</b>       | 7410<br>(1396)      | 0.659                      | 7333<br>(1498)       | 0.67                       | 6920<br>(2631)      | 0.203                      | 7360<br>(1453)           | 0.655                      | 7481<br>(1318)             | 0.616                      | 7235<br>(1599)            | 0.677                      | 7277<br>(1546)             | 0.674                      |
| <b>Placebo 3% vs Adrenaline 4%</b>       | 7285<br>(1524)      | 0.663                      | 7208<br>(1609)       | 0.678                      | 2274<br>(2186)      | 0.991                      | 6973<br>(1902)           | 0.709                      | 6804<br>(2003)             | 0.734                      | 6804<br>(2003)            | 0.734                      | 7139<br>(1707)             | 0.687                      |

|                                          |                |        |                |        |                |        |                |        |                |        |                |        |                |        |
|------------------------------------------|----------------|--------|----------------|--------|----------------|--------|----------------|--------|----------------|--------|----------------|--------|----------------|--------|
| <b>Null: Placebo 2% vs Adrenaline 2%</b> | 7987<br>(227)  | 0.0371 | 7978<br>(301)  | 0.0434 | 6806<br>(2650) | 0.2892 | 7961<br>(436)  | 0.0494 | 7972<br>(359)  | 0.0469 | 7973<br>(349)  | 0.0476 | 7971<br>(365)  | 0.0472 |
| <b>Placebo 4% vs Adrenaline 2%</b>       | 4140<br>(1641) | 0.999  | 3919<br>(1634) | 0.999  | 7371<br>(859)  | 0.905  | 4022<br>(1719) | 0.999  | 4157<br>(1707) | 0.999  | 3817<br>(1641) | 0.999  | 3842<br>(1646) | 0.999  |
| <b>Placebo 2% vs Adrenaline 4%</b>       | 3883<br>(1589) | 1      | 3695<br>(1625) | 0.997  | 1276<br>(873)  | 1      | 3334<br>(1631) | 0.999  | 3315<br>(1589) | 0.999  | 3603<br>(1650) | 0.999  | 3548<br>(1612) | 1      |
| <b>Placebo 3% vs Adrenaline 2%</b>       | 7172<br>(1587) | 0.792  | 7044<br>(1679) | 0.809  | 7392<br>(2069) | 0.2    | 7111<br>(1665) | 0.786  | 7180<br>(1603) | 0.771  | 6950<br>(1779) | 0.815  | 7031<br>(1734) | 0.809  |
| <b>Placebo 2% vs Adrenaline 3%</b>       | 6991<br>(1709) | 0.814  | 6836<br>(1839) | 0.822  | 2921<br>(2396) | 0.99   | 6499<br>(2102) | 0.852  | 6502<br>(2045) | 0.85   | 6757<br>(1910) | 0.827  | 6684<br>(1948) | 0.836  |

---

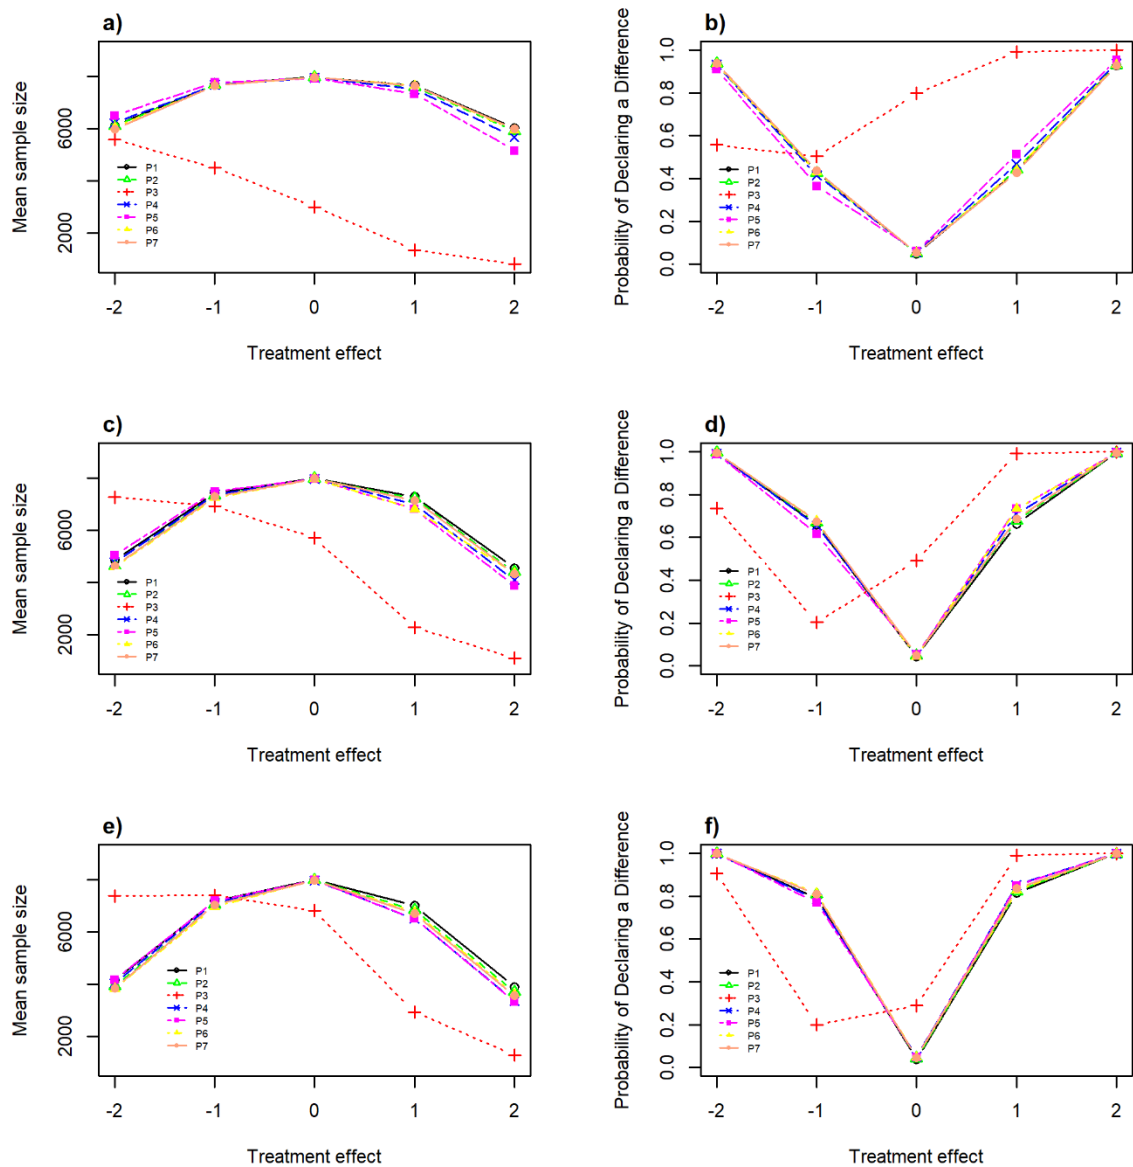

**Figure A2.1. Mean sample size (left column) and probability of declaring a difference between arms (right column) for Design B1 for each prior (P1-P7) across a range of treatment effects (difference between adrenaline and placebo survival rates) and different assumed survival rates. A positive treatment effect corresponds to adrenaline being superior; a negative treatment effect corresponds to adrenaline being harmful. Figures a) and b) correspond to a control survival rate of 6%; figures c) and d) correspond to a control survival rate of 3%; figures e) and f) correspond to a control survival rate of 2%.**

**Table A2.5 Prior sensitivity analysis for the Bayesian designs (Design B2)**

|                                          | Original prior (P1) |                            | Clinician prior (P2) |                            | PACA prior (P3)     |                            | PACA prior (vagner) (P4) |                            | RCT prior (pbo worse) (P5) |                            | RCT prior (pbo same) (P6) |                            | Observational studies (P7) |                            |
|------------------------------------------|---------------------|----------------------------|----------------------|----------------------------|---------------------|----------------------------|--------------------------|----------------------------|----------------------------|----------------------------|---------------------------|----------------------------|----------------------------|----------------------------|
|                                          | Average sample size | Prop. declaring difference | Average sample size  | Prop. declaring difference | Average sample size | Prop. declaring difference | Average sample size      | Prop. declaring difference | Average sample size        | Prop. declaring difference | Average sample size       | Prop. declaring difference | Average sample size        | Prop. declaring difference |
| <b>Null: Placebo 6% vs Adrenaline 6%</b> | 7961<br>(440)       | 0.0484                     | 7947<br>(522)        | 0.0516                     | 2500<br>(3033)      | 0.8296                     | 7918<br>(692)            | 0.0543                     | 7865<br>(916)              | 0.0644                     | 7938<br>(587)             | 0.0525                     | 7946<br>(540)              | 0.0504                     |
| <b>Placebo 8% vs Adrenaline 6%</b>       | 6137<br>(1911)      | 0.92                       | 6045<br>(1981)       | 0.919                      | 4934<br>(3660)      | 0.575                      | 6226<br>(1909)           | 0.914                      | 6508<br>(1729)             | 0.894                      | 6044<br>(2008)            | 0.921                      | 5975<br>(2046)             | 0.923                      |
| <b>Placebo 6% vs Adrenaline 8%</b>       | 5836<br>(1984)      | 0.943                      | 5703<br>(2072)       | 0.941                      | 620<br>(494)        | 1                          | 5491<br>(2209)           | 0.942                      | 4903<br>(2416)             | 0.96                       | 5641<br>(2138)            | 0.942                      | 5776<br>(2031)             | 0.941                      |
| <b>Placebo 7% vs Adrenaline 6%</b>       | 7695<br>(978)       | 0.419                      | 7645<br>(1093)       | 0.428                      | 3761<br>(3611)      | 0.603                      | 7699<br>(997)            | 0.404                      | 7753<br>(972)              | 0.36                       | 7653<br>(1073)            | 0.427                      | 7670<br>(1050)             | 0.424                      |
| <b>Placebo 6% vs Adrenaline 7%</b>       | 7584<br>(1217)      | 0.436                      | 7514<br>(1255)       | 0.44                       | 995<br>(1328)       | 0.996                      | 7402<br>(1459)           | 0.461                      | 7124<br>(1881)             | 0.519                      | 7518<br>(1267)            | 0.444                      | 7563<br>(1177)             | 0.427                      |
| <b>Null: Placebo 3% vs Adrenaline 3%</b> | 7980<br>(296)       | 0.0467                     | 7961<br>(426)        | 0.0519                     | 5197<br>(3422)      | 0.533                      | 7941<br>(554)            | 0.0556                     | 7944<br>(523)              | 0.0539                     | 7948<br>(513)             | 0.0549                     | 7956<br>(459)              | 0.054                      |
| <b>Placebo 5% vs Adrenaline 3%</b>       | 4882<br>(1932)      | 0.991                      | 4725<br>(1979)       | 0.994                      | 6768<br>(2569)      | 0.748                      | 4846<br>(1983)           | 0.994                      | 5115<br>(1924)             | 0.987                      | 4646<br>(2021)            | 0.998                      | 4709<br>(1987)             | 0.995                      |
| <b>Placebo 3% vs Adrenaline 5%</b>       | 4689<br>(1903)      | 0.996                      | 4468<br>(1907)       | 0.996                      | 886<br>(765)        | 1                          | 4126<br>(1998)           | 0.994                      | 3911<br>(1993)             | 0.995                      | 4441<br>(1956)            | 0.995                      | 4441<br>(1958)             | 0.996                      |
| <b>Placebo 4% vs Adrenaline 3%</b>       | 7343<br>(1375)      | 0.658                      | 7210<br>(1534)       | 0.662                      | 6439<br>(3023)      | 0.262                      | 7303<br>(1422)           | 0.644                      | 7422<br>(1295)             | 0.617                      | 7186<br>(1574)            | 0.669                      | 7241<br>(1504)             | 0.665                      |



|                                          |                |        |                |        |                |        |                |        |                |        |                |        |                |        |
|------------------------------------------|----------------|--------|----------------|--------|----------------|--------|----------------|--------|----------------|--------|----------------|--------|----------------|--------|
| <b>Placebo 3% vs Adrenaline 4%</b>       | 7260<br>(1430) | 0.665  | 7098<br>(1569) | 0.677  | 1886<br>(2066) | 0.992  | 6840<br>(1863) | 0.712  | 6736<br>(1935) | 0.736  | 7043<br>(1652) | 0.672  | 7051<br>(1641) | 0.68   |
| <b>Null: Placebo 2% vs Adrenaline 2%</b> | 7984<br>(242)  | 0.0411 | 7975<br>(324)  | 0.0462 | 6477<br>(2932) | 0.3244 | 7957<br>(453)  | 0.0527 | 7965<br>(395)  | 0.0503 | 7963<br>(408)  | 0.0506 | 7964<br>(398)  | 0.0514 |
| <b>Placebo 4% vs Adrenaline 2%</b>       | 4248<br>(1706) | 1      | 4017<br>(1740) | 0.999  | 7032<br>(1944) | 0.884  | 4099<br>(1772) | 0.999  | 4240<br>(1772) | 0.999  | 3886<br>(1763) | 1      | 3991<br>(1763) | 1      |
| <b>Placebo 2% vs Adrenaline 4%</b>       | 4019<br>(1674) | 1      | 3793<br>(1696) | 1      | 1053<br>(871)  | 1      | 3409<br>(1714) | 1      | 3345<br>(1693) | 1      | 3677<br>(1709) | 1      | 3634<br>(1707) | 1      |
| <b>Placebo 3% vs Adrenaline 2%</b>       | 7106<br>(1460) | 0.779  | 6980<br>(1579) | 0.786  | 7155<br>(2381) | 0.222  | 6997<br>(1596) | 0.766  | 7082<br>(1510) | 0.761  | 6846<br>(1743) | 0.719  | 6907<br>(1667) | 0.785  |
| <b>Placebo 2% vs Adrenaline 3%</b>       | 6928<br>(1621) | 0.789  | 6753<br>(1710) | 0.799  | 2557<br>(2379) | 0.984  | 6403<br>(1992) | 0.826  | 6418<br>(1950) | 0.841  | 6625<br>(1810) | 0.806  | 6597<br>(1837) | 0.811  |

---

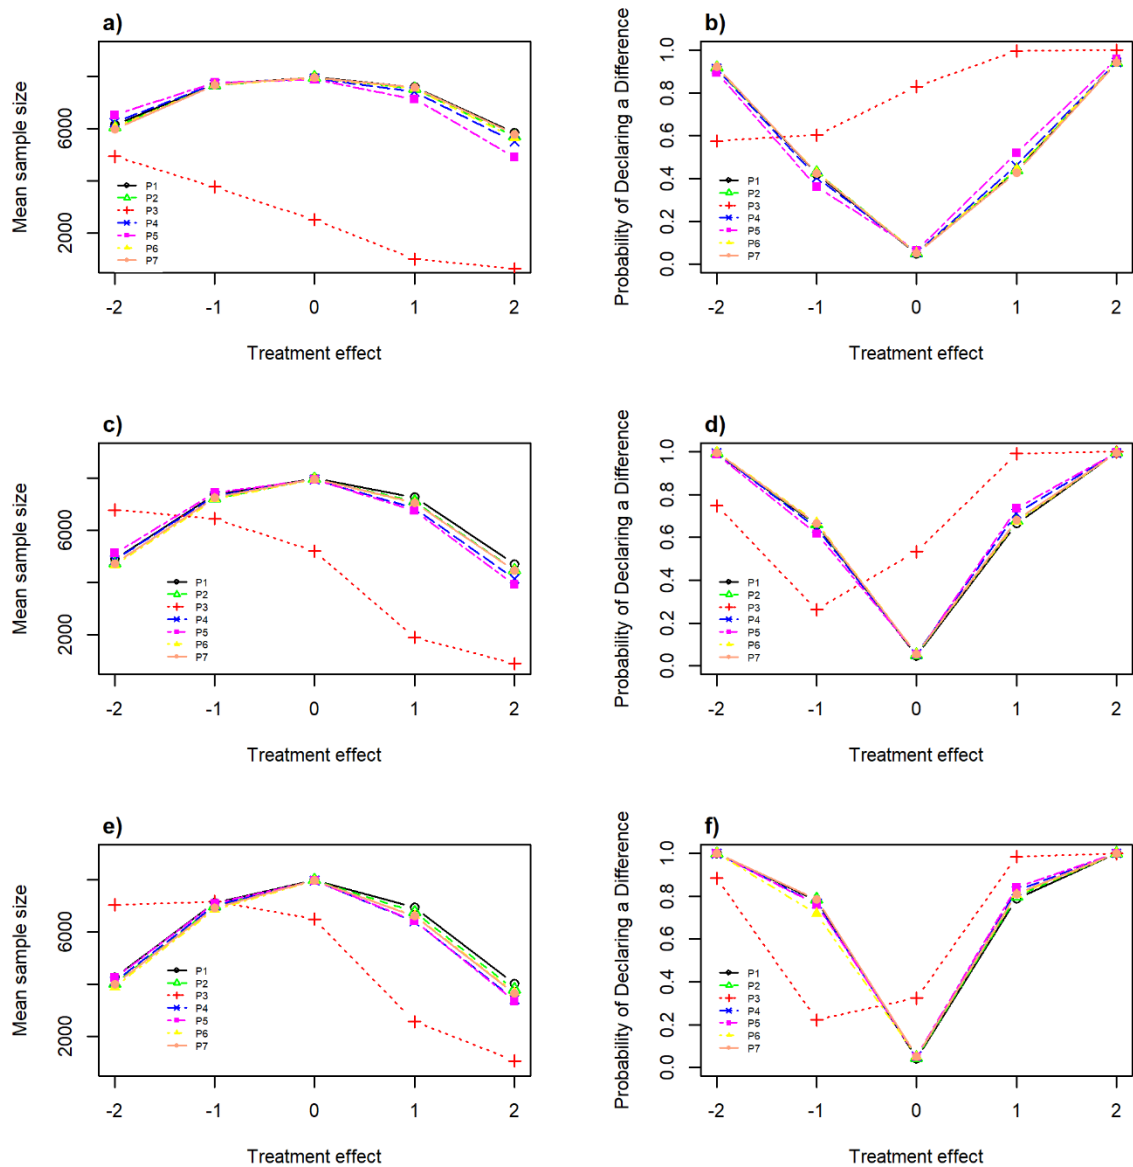

**Figure A2.2.** Mean sample size (left column) and probability of declaring a difference between arms (right column) for Design B2 for each prior (P1-P7) across a range of treatment effects (difference between adrenaline and placebo survival rates) and different assumed survival rates. A positive treatment effect corresponds to adrenaline being superior; a negative treatment effect corresponds to adrenaline being harmful. Figures a) and b) correspond to a control survival rate of 6%; figures c) and d) correspond to a control survival rate of 3%; figures e) and f) correspond to a control survival rate of 2%.

**Table A2.6 Prior sensitivity analysis for the Bayesian designs (Design B3)**

|                                          | Original prior (P1) |                            | Clinician prior (P2) |                            | PACA prior (P3)     |                            | PACA prior (vagner) (P4) |                            | RCT prior (pbo worse) (P5) |                            | RCT prior (pbo same) (P6) |                            | Observational studies (P7) |                            |
|------------------------------------------|---------------------|----------------------------|----------------------|----------------------------|---------------------|----------------------------|--------------------------|----------------------------|----------------------------|----------------------------|---------------------------|----------------------------|----------------------------|----------------------------|
|                                          | Average sample size | Prop. declaring difference | Average sample size  | Prop. declaring difference | Average sample size | Prop. declaring difference | Average sample size      | Prop. declaring difference | Average sample size        | Prop. declaring difference | Average sample size       | Prop. declaring difference | Average sample size        | Prop. declaring difference |
| <b>Null: Placebo 6% vs Adrenaline 6%</b> | 7936<br>(492)       | 0.0515                     | 7917<br>(603)        | 0.0542                     | 2929<br>(2995)      | 0.8061                     | 7909<br>(635)            | 0.058                      | 7871<br>(794)              | 0.0643                     | 7912<br>(618)             | 0.0566                     | 7918<br>(590)              | 0.0552                     |
| <b>Placebo 8% vs Adrenaline 6%</b>       | 5562<br>(1879)      | 0.935                      | 5477<br>(1928)       | 0.939                      | 5892<br>(3228)      | 0.502                      | 5637<br>(1877)           | 0.932                      | 5949<br>(1780)             | 0.913                      | 5451<br>(1956)            | 0.937                      | 5430<br>(1957)             | 0.939                      |
| <b>Placebo 6% vs Adrenaline 8%</b>       | 5333<br>(1829)      | 0.945                      | 5250<br>(1856)       | 0.944                      | 855<br>(619)        | 1                          | 5086<br>(1950)           | 0.946                      | 4620<br>(2088)             | 0.953                      | 5275<br>(1869)            | 0.943                      | 5342<br>(1832)             | 0.941                      |
| <b>Placebo 7% vs Adrenaline 6%</b>       | 7497<br>(1183)      | 0.424                      | 7435<br>(1268)       | 0.443                      | 4567<br>(3518)      | 0.505                      | 7482<br>(1217)           | 0.417                      | 7652<br>(982)              | 0.362                      | 7419<br>(1310)            | 0.437                      | 7410<br>(1327)             | 0.447                      |
| <b>Placebo 6% vs Adrenaline 7%</b>       | 7382<br>(1216)      | 0.435                      | 7314<br>(1350)       | 0.442                      | 1225<br>(1277)      | 0.993                      | 7205<br>(1509)           | 0.457                      | 6922<br>(1821)             | 0.509                      | 7297<br>(1391)            | 0.436                      | 7361<br>(1287)             | 0.432                      |
| <b>Null: Placebo 3% vs Adrenaline 3%</b> | 7957<br>(293)       | 0.0492                     | 7943<br>(440)        | 0.0535                     | 5723<br>(3013)      | 0.4917                     | 7916<br>(594)            | 0.0577                     | 7915<br>(587)              | 0.0575                     | 7934<br>(505)             | 0.0569                     | 7932<br>(511)              | 0.0555                     |
| <b>Placebo 5% vs Adrenaline 3%</b>       | 4416<br>(1587)      | 0.995                      | 4229<br>(1672)       | 0.995                      | 7106<br>(1831)      | 0.732                      | 4359<br>(1666)           | 0.997                      | 4621<br>(1648)             | 0.994                      | 4193<br>(1718)            | 0.995                      | 4211<br>(1684)             | 0.996                      |
| <b>Placebo 3% vs Adrenaline 5%</b>       | 4186<br>(1535)      | 0.993                      | 4023<br>(1599)       | 0.994                      | 1083<br>(682)       | 1                          | 3740<br>(1656)           | 0.994                      | 3551<br>(1618)             | 0.996                      | 3961<br>(1616)            | 0.993                      | 3975<br>(1619)             | 0.993                      |
| <b>Placebo 4% vs Adrenaline 3%</b>       | 7052<br>(1475)      | 0.66                       | 6980<br>(1545)       | 0.666                      | 7063<br>(2405)      | 0.185                      | 7030<br>(1516)           | 0.648                      | 7156<br>(1404)             | 0.617                      | 6929<br>(1608)            | 0.672                      | 6939<br>(1596)             | 0.666                      |
| <b>Placebo 3% vs Adrenaline 4%</b>       | 6821<br>(1512)      | 0.678                      | 6722<br>(1616)       | 0.687                      | 2162<br>(1831)      | 0.992                      | 6508<br>(1795)           | 0.72                       | 6385<br>(1847)             | 0.742                      | 6683<br>(1676)            | 0.693                      | 6693<br>(1641)             | 0.691                      |
| <b>Null: Placebo 2% vs Adrenaline 2%</b> | 7970<br>(282)       | 0.0415                     | 7963<br>(333)        | 0.0473                     | 7003<br>(2245)      | 0.2696                     | 7935<br>(484)            | 0.0555                     | 7945<br>(430)              | 0.0529                     | 7949<br>(415)             | 0.0521                     | 7944<br>(439)              | 0.0518                     |

|                                    |                |       |                |       |                |       |                |       |                |       |                |       |                |       |
|------------------------------------|----------------|-------|----------------|-------|----------------|-------|----------------|-------|----------------|-------|----------------|-------|----------------|-------|
| <b>Placebo 4% vs Adrenaline 2%</b> | 3854<br>(1364) | 0.999 | 3659<br>(1405) | 0.999 | 7091<br>(1182) | 0.901 | 3711<br>(1425) | 0.999 | 3877<br>(1412) | 0.999 | 3558<br>(1445) | 0.999 | 3616<br>(1424) | 0.999 |
| <b>Placebo 2% vs Adrenaline 4%</b> | 3643<br>(1327) | 0.999 | 3489<br>(1340) | 0.999 | 1273<br>(785)  | 1     | 3143<br>(1383) | 0.998 | 3109<br>(1365) | 0.998 | 3385<br>(1374) | 0.998 | 3374<br>(1389) | 0.999 |
| <b>Placebo 3% vs Adrenaline 2%</b> | 6691<br>(1594) | 0.788 | 6576<br>(1689) | 0.795 | 7640<br>(1530) | 0.18  | 6632<br>(1684) | 0.78  | 6692<br>(1652) | 0.767 | 6438<br>(1816) | 0.806 | 6547<br>(1742) | 0.791 |
| <b>Placebo 2% vs Adrenaline 3%</b> | 6436<br>(1592) | 0.80  | 6306<br>(1678) | 0.807 | 2764<br>(2025) | 0.99  | 5979<br>(1900) | 0.826 | 6010<br>(1846) | 0.838 | 6239<br>(1759) | 0.811 | 6187<br>(1763) | 0.814 |

---

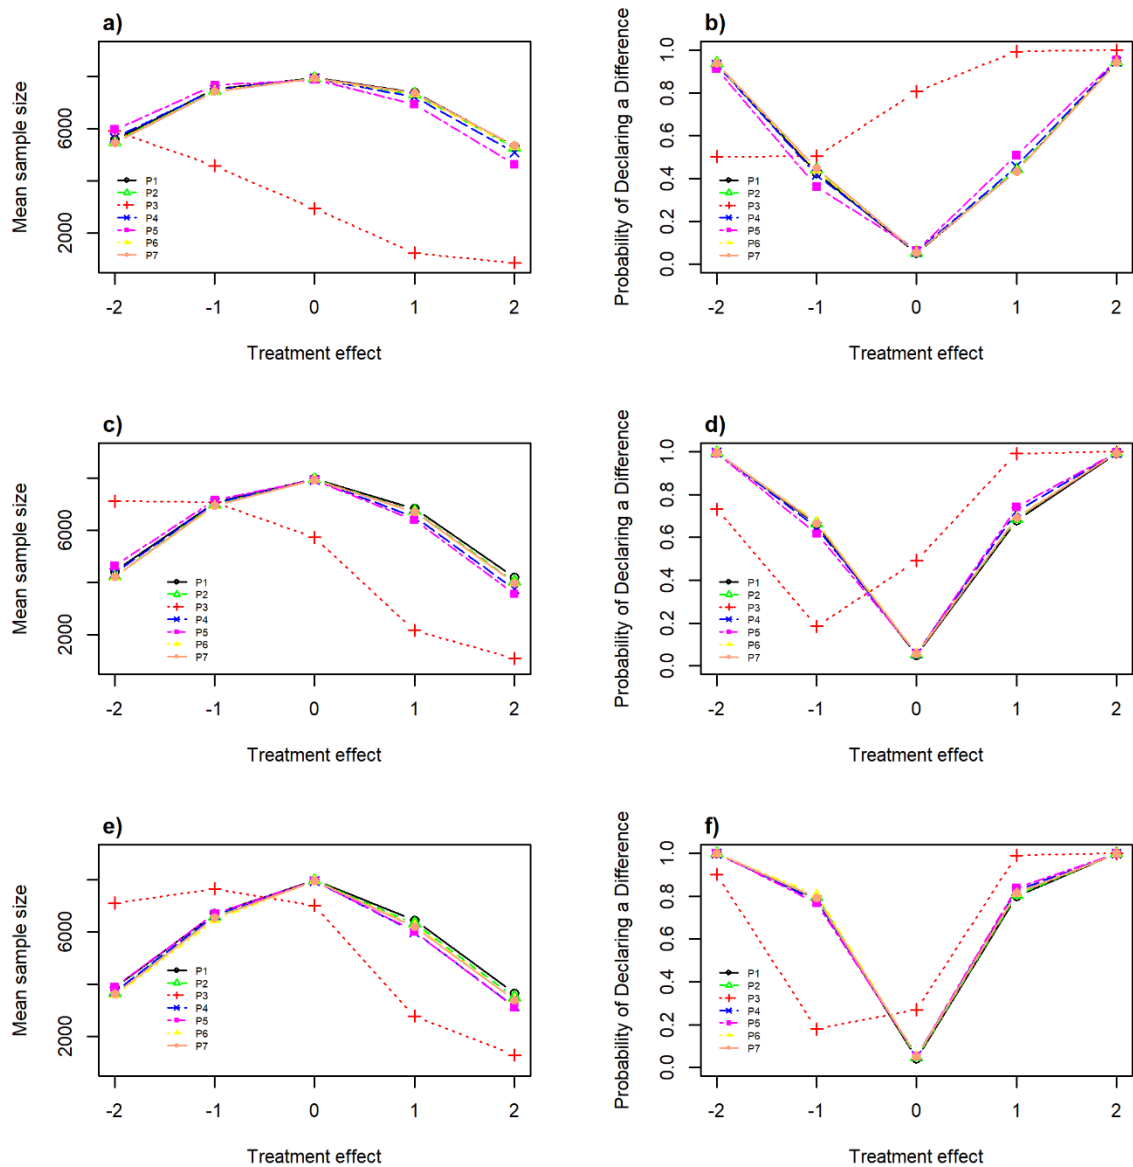

**Figure A2.3. Mean sample size (left column) and probability of declaring a difference between arms (right column) for Design B3 for each prior (P1-P7) across a range of treatment effects (difference between adrenaline and placebo survival rates) and different assumed survival rates. A positive treatment effect corresponds to adrenaline being superior; a negative treatment effect corresponds to adrenaline being harmful. Figures a) and b) correspond to a control survival rate of 6%; figures c) and d) correspond to a control survival rate of 3%; figures e) and f) correspond to a control survival rate of 2%.**

## References

1. Jacobs IG, Finn JC, Jelinek GA, Oxer HF, Thompson PL. Effect of adrenaline on survival in out-of-hospital cardiac arrest: A randomised double-blind placebo controlled trial. *Resuscitation* 2011; 82:1138-43.
2. Brown CG, Martin DR, Pepe PE, Stueven H, Cummins RO, Gonzalez E, et al. A comparison of standard-dose and high-dose epinephrine in cardiac arrest outside the hospital. The Multicenter High-Dose Epinephrine Study Group. *N Engl J Med.* 1992; 327(15):1051-5.

3. Callaham M, Madsen CD, Barton CW, Saunders CE, Pointer J. A randomised clinical trial of high dose epinephrine and norepinephrine versus standard dose epinephrine in pre-hospital cardiac arrest. *J Am Med Assoc.* 1992;268:2667– 72
4. Gueugniaud PY, Mols P, Goldstein P, Pham E, Dubien PY, Deweerdt C, et al. A comparison of repeated high dose and repeated standard dose of epinephrine for cardiac arrest outside the hospital. *N Engl J Med.* 1998; 339:1595– 601.
5. Sherman BW, Munger MA, Foulke GE, Rutherford WF, Panacek EA. High-dose versus standard-dose epinephrine treatment of cardiac arrest after failure of standard therapy. *Pharmacotherapy.* 1997;17(2):242– 7.
6. Steill IG, Hebert PC, Weitzman BN, Wells GA, Raman S, Stark RM, et al. High-Dose Epinephrine in Adult Cardiac Arrest. *N Engl J Med.* 1992; 327:1045-1050
7. Ducros L, Vicaut E, Soleil C, Le Guen M, Gueye P, Poussant T, et al. Effect of the addition of vasopressin or vasopressin plus nitroglycerin to epinephrine on arterial blood pressure during cardiopulmonary resuscitation in humans. *J Emerg Med.* 2011;41(5):453–9
8. Gueugniaud PY, David JS, Chanzy E, Hubert H, DubienPY, Mauriaucourt P, et al. Vasopressin and epinephrine vs.epinephrine alone in cardiopulmonary resuscitation. *N Engl J Med.* 2008; 359(1):21–30.
9. Lindner KH, Dirks B, Strohmenger HU, Prengel AW,Lindner IM, Lurie KG. Randomised comparison of epinephrine and vasopressin in patients with out-of-hospital ventricular fibrillation. *Lancet.* 1997;349(9051):535–7
10. Ong ME, Tiah L, Leong BS, Tan EC, Ong VY, Tan EA, et al. A randomised, double-blind, multi-centre trial comparing vasopressin and adrenaline in patients with cardiac arrest presenting to or in the emergency department. *Resuscitation.* 2012;83:953–60
11. Wenzel V, Krismer AC, Arntz HR, Sitter H, Stadlbauer KH, Lindner KH, et al. A comparison of vasopressinand epinephrine for out-of-hospital cardiopulmonary resuscitation. *N Engl J Med.* 2004;350(2):105–13
12. Hagihara A, Hasegawa M, Abe T, Nagata T, Wakata Y,Miyazaki S. Prehospital epinephrine use and survival among patients with out-of-hospital cardiac arrest. *JAMA.* 2012;307(11):1161–8
13. Holmberg M, Holmberg S, Herlitz J. Low chance of survival among patients requiring adrenaline (epinephrine) or intubation after out-of-hospital cardiac arrest in Sweden. *Resuscitation.* 2002; 54(1): 37-45.
14. Kirves H, Skrifvars MB, Vähäkuopus M, Ekström K, Martikainen M, Castren M. Adherence to resuscitation guidelines during prehospital care of cardiac arrest patients. *EJEM.* 2007; 14(2): 75-81.
15. Olasveengen TM, Wik L, Sunde K, Steen PA. Outcome when adrenaline (epinephrine) was actually given vs. not given - post hoc analysis of a randomized clinical trial. *Resuscitation.* 2012; 83(3): 327-32.
16. Ong ME, Tan EH, Ng FS, Panchalingham A, Lim SH, Manning PG, et al. Survival outcomes with the introduction of intravenous epinephrine in the management of out-of-hospital cardiac arrest. *Ann Emerg Med.* 2007; 50(6): 635-42.
17. Vayrynen T, Kuisma M, Maatta T, Boyd J: Who survives from out-of-hospital pulseless electrical activity? *Resuscitation.* 2008, 76: 207-213.
18. Hayashi Y, Iwami T, Kitamura T, Nishiuchi T, Kajino K, Sakai T, et al. Impact of early intravenous epinephrine administration on outcomes following out-of-hospital cardiac arrest. *Circ J.* 2012; 76(7): 1639-45.
19. Herlitz J, Ekstrom L, Wennerblom B, Axelsson A, Bang A, Holmberg S. Adrenaline in out-of-hospital ventricular fibrillation. Does it make any difference? *Resuscitation.* 1995; 29:195– 201.
