# Supplementary material for: Bayesian group sequential designs for phase III emergency medicine trials: a case study using the PARAMEDIC2 trial
Source: PubMed Central journal article supplement (PMC6961266; doi:10.1186/s13063-019-4024-x), 2020-01-14
Supplement: 13063_2019_4024_MOESM3_ESM.pdf [file 13063_2019_4024_MOESM3_ESM.pdf]

## Additional File 3 - Effect of varying recruitment rate on the operating characteristics of Design B1

We explored the effect of having a faster recruitment rate (80/week) and a slower recruitment rate (25/week) on the operating characteristics of Bayesian design B1, which had interim analyses that occurred on a time basis. Table A3 displays these results.

The average sample size generally increased with both a faster and slower recruitment rate. The type I error was generally slightly lower with faster and slower recruitment. The power generally increased slightly with slower recruitment in the adrenaline superior scenarios; there were no overall patterns for the power using a faster recruitment rate. More early stopping occurred with a faster recruitment rate, and less occurred with a slower recruitment rate.

**Table A3. Operating characteristics of Bayesian design 1 (B1), assuming faster and slower recruitment rates**

|                                          | Original recruitment (53/week) |                                      |                                         | Faster recruitment (80/week) |                                      |                                         | Slower recruitment (25/week) |                                      |                                         |
|------------------------------------------|--------------------------------|--------------------------------------|-----------------------------------------|------------------------------|--------------------------------------|-----------------------------------------|------------------------------|--------------------------------------|-----------------------------------------|
|                                          | Average sample size (sd)       | Proportion stopped early (correctly) | Overall proportion declaring difference | Average sample size (sd)     | Proportion stopped early (correctly) | Overall proportion declaring difference | Average sample size (sd)     | Proportion stopped early (correctly) | Overall proportion declaring difference |
| <b>Null: Placebo 6% vs Adrenaline 6%</b> | 7968 (390)                     | 0.0074                               | <i>0.0493</i>                           | 7972 (363)                   | 0.0089                               | <i>0.0486</i>                           | 7964 (469)                   | 0.0062                               | <i>0.048</i>                            |
| <b>Placebo 8% vs Adrenaline 6%</b>       | 6100 (2075)                    | 0.502                                | 0.935                                   | 6324 (1861)                  | 0.632                                | 0.935                                   | 6975 (2243)                  | 0.175                                | 0.933                                   |
| <b>Placebo 6% vs Adrenaline 8%</b>       | 6019 (2107)                    | 0.525                                | 0.928                                   | 6200 (1967)                  | 0.641                                | 0.936                                   | 6773 (2405)                  | 0.209                                | 0.95                                    |
| <b>Placebo 7% vs Adrenaline 6%</b>       | 7676 (1149)                    | 0.084                                | 0.431                                   | 7731 (956)                   | 0.116                                | 0.432                                   | 7831 (989)                   | 0.029                                | 0.383                                   |
| <b>Placebo 6% vs Adrenaline 7%</b>       | 7654 (1174)                    | 0.09                                 | 0.433                                   | 7727 (925)                   | 0.13                                 | 0.409                                   | 7737 (1220)                  | 0.045                                | 0.474                                   |
| <b>Null: Placebo 3% vs Adrenaline 3%</b> | 7980 (293)                     | 0.0053                               | <i>0.044</i>                            | 7986 (250)                   | 0.0048                               | <i>0.0429</i>                           | 7985 (291)                   | 0.0027                               | <i>0.0432</i>                           |
| <b>Placebo 5% vs Adrenaline 3%</b>       | 4842 (1985)                    | 0.779                                | 0.994                                   | 5144 (1796)                  | 0.902                                | 0.992                                   | 5953 (2803)                  | 0.351                                | 0.997                                   |
| <b>Placebo 3% vs Adrenaline 5%</b>       | 4546 (1960)                    | 0.828                                | 0.995                                   | 5001 (1810)                  | 0.912                                | 0.994                                   | 5805 (2833)                  | 0.379                                | 0.996                                   |
| <b>Placebo 4% vs Adrenaline 3%</b>       | 7410 (1396)                    | 0.17                                 | 0.659                                   | 7459 (1267)                  | 0.244                                | 0.669                                   | 7672 (1342)                  | 0.057                                | 0.651                                   |
| <b>Placebo 3% vs Adrenaline 4%</b>       | 7285 (1524)                    | 0.202                                | 0.663                                   | 7394 (1322)                  | 0.276                                | 0.65                                    | 7650 (1372)                  | 0.062                                | 0.688                                   |
| <b>Null: Placebo 2% vs Adrenaline 2%</b> | 7987 (227)                     | 0.004                                | <i>0.0371</i>                           | 7991 (181)                   | 0.0036                               | <i>0.0373</i>                           | 7995 (172)                   | 0.001                                | <i>0.0366</i>                           |
| <b>Placebo 4% vs Adrenaline 2%</b>       | 4140 (1641)                    | 0.908                                | 0.999                                   | 4549 (1580)                  | 0.968                                | 0.9990                                  | 5439 (2917)                  | 0.439                                | 1                                       |
| <b>Placebo 2% vs Adrenaline 4%</b>       | 3883 (1589)                    | 0.934                                | 1                                       | 4333 (1559)                  | 0.982                                | 1                                       | 5098 (2923)                  | 0.5                                  | 0.999                                   |
| <b>Placebo 3% vs Adrenaline 2%</b>       | 7172 (1587)                    | 0.234                                | 0.792                                   | 7215 (1359)                  | 0.383                                | 0.814                                   | 7631 (1397)                  | 0.066                                | 0.785                                   |
| <b>Placebo 2% vs Adrenaline 3%</b>       | 6991 (1709)                    | 0.288                                | 0.814                                   | 7165 (1422)                  | 0.392                                | 0.782                                   | 7604 (1442)                  | 0.071                                | 0.802                                   |
