# Supplementary material for: Bayesian group sequential designs for phase III emergency medicine trials: a case study using the PARAMEDIC2 trial
Source: PubMed Central journal article supplement (PMC6961266; doi:10.1186/s13063-019-4024-x), 2020-01-14
Supplement: 13063_2019_4024_MOESM4_ESM.pdf [file 13063_2019_4024_MOESM4_ESM.pdf]

## Additional File 4 - Operating characteristics for Bayesian design based on frequentist stopping boundaries

The stopping boundaries for this design were obtained from 1 – nominal p-values obtained from the frequentist stopping boundaries in Additional File 1 Table A1.1. Whilst this design had smaller average sample sizes compared to Bayesian Designs B1-B3, it often had smaller probabilities of declaring a difference between the arms particularly when adrenaline was assumed to be superior. This design also often gave a high proportion of flip-flops, particularly for the “adrenaline superior” scenarios. We therefore used stricter stopping boundaries for Designs B1-B3.

**Table A4. Operating characteristics for Bayesian design based on original frequentist stopping boundaries for PARAMEDIC2**

| Design and scenarios <sup>a</sup> | Average duration (weeks) | Average sample size (sd) | Proportion stopped early <sup>b</sup> | Overall proportion declaring a difference <sup>c</sup> | Proportion that did not declare a difference | Proportion flip-flop <sup>d</sup> | Average probability adrenaline superior |
|-----------------------------------|--------------------------|--------------------------|---------------------------------------|--------------------------------------------------------|----------------------------------------------|-----------------------------------|-----------------------------------------|
| Null: Placebo 6% vs Adrenaline 6% | 166                      | 7836 (862)               | 0.0307                                | <i>0.0414</i>                                          | 0.9488                                       | 0.0098                            | 0.5064                                  |
| Placebo 8% vs Adrenaline 6%       | 111                      | 4923 (1882)              | 0.782                                 | 0.921                                                  | 0.073                                        | 0.006                             | 0.0078                                  |
| Placebo 6% vs Adrenaline 8%       | 108                      | 4778 (2348)              | 0.631                                 | 0.777                                                  | 0.134                                        | 0.089                             | 0.9919                                  |
| Placebo 7% vs Adrenaline 6%       | 150                      | 7019 (1612)              | 0.283                                 | 0.437                                                  | 0.548                                        | 0.015                             | 0.0996                                  |
| Placebo 6% vs Adrenaline 7%       | 151                      | 7077 (1843)              | 0.185                                 | 0.262                                                  | 0.695                                        | 0.043                             | 0.8992                                  |
| Null: Placebo 3% vs Adrenaline 3% | 166                      | 7881 (706)               | 0.024                                 | <i>0.036</i>                                           | 0.9565                                       | 0.0075                            | 0.5033                                  |
| Placebo 5% vs Adrenaline 3%       | 91                       | 3889 (1402)              | 0.948                                 | 0.991                                                  | 0.006                                        | 0.003                             | 0.0021                                  |
| Placebo 3% vs Adrenaline 5%       | 84                       | 3536 (1804)              | 0.844                                 | 0.908                                                  | 0.013                                        | 0.079                             | 0.997                                   |
| Placebo 4% vs Adrenaline 3%       | 138                      | 6384 (1856)              | 0.461                                 | 0.649                                                  | 0.34                                         | 0.011                             | 0.0425                                  |
| Placebo 3% vs Adrenaline 4%       | 140                      | 6486 (2130)              | 0.319                                 | 0.473                                                  | 0.472                                        | 0.055                             | 0.9559                                  |
| Null: Placebo 2% vs Adrenaline 2% | 167                      | 7929 (523)               | 0.0163                                | <i>0.0292</i>                                          | 0.9964                                       | 0.0044                            | 0.5026                                  |
| Placebo 4% vs Adrenaline 2%       | 83                       | 3472 (1100)              | 0.985                                 | 0.999                                                  | 0.001                                        | 0                                 | 0.0012                                  |
| Placebo 2% vs Adrenaline 4%       | 75                       | 3029 (1424)              | 0.911                                 | 0.938                                                  | 0.003                                        | 0.059                             | 0.9978                                  |
| Placebo 3% vs Adrenaline 2%       | 132                      | 6043 (1870)              | 0.563                                 | 0.778                                                  | 0.216                                        | 0.006                             | 0.0238                                  |
| Placebo 2% vs Adrenaline 3%       | 131                      | 6017 (2211)              | 0.429                                 | 0.505                                                  | 0.338                                        | 0.066                             | 0.9761                                  |

<sup>a</sup>Different effect size scenarios that were simulated for each design are given as placebo 30-day survival rate vs adrenaline rate. <sup>b</sup>Proportion of simulations that stopped early and were declared to have a difference (in the correct direction) at the final analysis. <sup>c</sup>The simulated type I errors are italicised. <sup>d</sup>These simulations were stopped early for efficacy or harm, but did not meet the critical values to declare a difference between the treatments at the final analysis once all patients were followed up (insufficient evidence of a difference)
