# Supplementary material for: Bayesian group sequential designs for phase III emergency medicine trials: a case study using the PARAMEDIC2 trial
Source: PubMed Central journal article supplement (PMC6961266; doi:10.1186/s13063-019-4024-x), 2020-01-14
Supplement: 13063_2019_4024_MOESM5_ESM.pdf [file 13063_2019_4024_MOESM5_ESM.pdf]

## Additional File 5 - Example trials

Here we present single trial simulations for each Bayesian design to illustrate the decisions that may be made at each analysis based on the accumulated data. The true 30-day survival rates are assumed to be 2% and 3% for the placebo and adrenaline arm, respectively. Prior P1 was used.

### A5.1 Bayesian Design B1

**Table A5.1.1 Example trial 1: late declaration of adrenaline superior for Bayesian Design B1**

| Analysis # | Num subjects recruited (pbo:adr) | Num subjects with complete data (pbo:adr) | Pr(adrenaline superior) | Pr(placebo superior) | Duration (weeks) | Posterior Estimated response pbo | Posterior Estimated response adr |
|------------|----------------------------------|-------------------------------------------|-------------------------|----------------------|------------------|----------------------------------|----------------------------------|
| 1          | 50 (25:25)                       | 5: 4                                      | 0.3472                  | 0.6528               | 8.33206          | 0.080217                         | 0.063581                         |
| 2          | 463 (231:232)                    | 142:142                                   | 0.7604                  | 0.2396               | 21.3321          | 0.029805                         | 0.041469                         |
| 3          | 1092 (546:546)                   | 439: 439                                  | 0.6692                  | 0.3308               | 34.3321          | 0.02723                          | 0.031666                         |
| 4          | 1802 (901:901)                   | 787: 788                                  | 0.7264                  | 0.2736               | 47.3321          | 0.025329                         | 0.029781                         |
| 5          | 2491 (1245:1246)                 | 1131:1130                                 | 0.5792                  | 0.4208               | 60.3321          | 0.026321                         | 0.027568                         |
| 6          | 3170 (1585:1585)                 | 1479:1479                                 | 0.7412                  | 0.2588               | 73.3321          | 0.026597                         | 0.03042                          |
| 7          | 3858 (1929:1929)                 | 1811:1810                                 | 0.7776                  | 0.2224               | 86.3321          | 0.024692                         | 0.02865                          |
| 8          | 4518 (2259:2259)                 | 2153:2152                                 | 0.7688                  | 0.2312               | 99.3321          | 0.024297                         | 0.027893                         |
| 9          | 5199 (2600:2599)                 | 2491:2492                                 | 0.8224                  | 0.1776               | 112.332          | 0.024072                         | 0.028357                         |
| 10         | 5889 (2945:2944)                 | 2828:2829                                 | 0.9664                  | 0.0336               | 125.332          | 0.022784                         | 0.030505                         |
| Final      | 8000 (4000:4000)                 | 4000:4000                                 | 0.9816                  | 0.0184               | 168.669          | 0.022815                         | 0.03073                          |

Pbo = Placebo; Adr = Adrenaline

**Table A5.1.2 Example trial 2: correct early stopping for adrenaline superior for Bayesian Design B1**

| Analysis # | Num subjects recruited (pbo:adr) | Num subjects with complete data (pbo:adr) | Pr(adrenaline superior) | Pr(placebo superior) | Duration (weeks) | Posterior Estimated response pbo | Posterior Estimated response adr |
|------------|----------------------------------|-------------------------------------------|-------------------------|----------------------|------------------|----------------------------------|----------------------------------|
| 1          | 50 (25:25)                       | 4: 4                                      | 0.4972                  | 0.5028               | 8.9265           | 0.065081                         | 0.065374                         |
| 2          | 428 (214:214)                    | 130:130                                   | 0.838                   | 0.162                | 21.9265          | 0.031838                         | 0.048759                         |
| 3          | 1131 (566:565)                   | 454: 454                                  | 0.9032                  | 0.0968               | 34.9265          | 0.021535                         | 0.034755                         |
| 4          | 1846 (923:923)                   | 802: 803                                  | 0.9568                  | 0.0432               | 47.9265          | 0.021632                         | 0.034661                         |
| 5          | 2508 (1254:1254)                 | 1139: 1139                                | 0.9904                  | 0.0096               | 60.9265          | 0.020487                         | 0.035433                         |
| 6          | 3222 (1611:1611)                 | 1487: 1486                                | 1                       | 0                    | 73.9265          | 0.01828                          | 0.038646                         |
| Final      | 3222 (1611:1611)                 | 1611: 1611                                | 0.9992                  | 0.0008               | 78.2033          | 0.020416                         | 0.039784                         |

Pbo = Placebo; Adr = Adrenaline

**Table A5.1.3 Example trial 3: late futility (unable to declare either arm superior) for Bayesian Design B1**

| Analysis # | Num subjects recruited (pbo:adr) | Num subjects with complete data (pbo:adr) | Pr(adrenaline superior) | Pr(placebo superior) | Duration (weeks) | Posterior Estimated response pbo | Posterior Estimated response adr |
|------------|----------------------------------|-------------------------------------------|-------------------------|----------------------|------------------|----------------------------------|----------------------------------|
| 1          | 50 (25:25)                       | 2: 3                                      | 0.5124                  | 0.4876               | 7.40074          | 0.06531                          | 0.065537                         |
| 2          | 403 (201:202)                    | 109: 108                                  | 0.5048                  | 0.4952               | 20.4007          | 0.044058                         | 0.044921                         |
| 3          | 1015 (508:507)                   | 399: 398                                  | 0.8088                  | 0.1912               | 33.4007          | 0.025265                         | 0.034331                         |
| 4          | 1664 (832:832)                   | 720: 720                                  | 0.936                   | 0.064                | 46.4007          | 0.024659                         | 0.036738                         |
| 5          | 2331 (1166:1165)                 | 1051: 1051                                | 0.958                   | 0.042                | 59.4007          | 0.019243                         | 0.02995                          |
| 6          | 3040 (1520:1520)                 | 1403: 1402                                | 0.99                    | 0.01                 | 72.4007          | 0.019531                         | 0.031902                         |
| 7          | 3721 (1860:1861)                 | 1757: 1757                                | 0.9684                  | 0.0316               | 85.4007          | 0.022297                         | 0.032021                         |
| 8          | 4401 (2200:2201)                 | 2085: 2085                                | 0.9896                  | 0.0104               | 98.4007          | 0.021315                         | 0.033305                         |
| 9          | 5145 (2573:2572)                 | 2462: 2462                                | 0.9828                  | 0.0172               | 111.401          | 0.022457                         | 0.032028                         |
| 10         | 5868 (2934:2934)                 | 2822: 2821                                | 0.9816                  | 0.0184               | 124.401          | 0.022476                         | 0.031262                         |

Final 8000 (4000:4000) 4000 : 4000 0.97 0.03 169.469 0.022668 0.029945

Pbo = Placebo; Adr = Adrenaline

## A5.2 Bayesian Design B2

**Table A5.2.1 Example trial 1: late declaration of adrenaline superior for Bayesian Design B2**

| Analysis # | Num subjects recruited (pbo:adr) | Num subjects with complete data (pbo:adr) | Pr(adrenaline superior) | Pr(placebo superior) | Duration (weeks) | Posterior Estimated response pbo | Posterior Estimated response adr |
|------------|----------------------------------|-------------------------------------------|-------------------------|----------------------|------------------|----------------------------------|----------------------------------|
| 1          | 50 (25:25)                       | 5 : 4                                     | 0.6544                  | 0.3456               | 7.41905          | 0.082909                         | 0.030122                         |
| 2          | 300 (150:150)                    | 87 : 87                                   | 0.8352                  | 0.1648               | 17.861           | 0.068242                         | 0.015621                         |
| 3          | 600 (300:300)                    | 202 : 202                                 | 0.8736                  | 0.1264               | 24.839           | 0.04608                          | 0.008961                         |
| 4          | 1000 (500:500)                   | 382 : 383                                 | 0.8224                  | 0.1776               | 32.5322          | 0.041917                         | 0.007709                         |
| 5          | 1450 (725:725)                   | 611 : 610                                 | 0.7612                  | 0.2388               | 41.112           | 0.036515                         | 0.006451                         |
| 6          | 1900 (950:950)                   | 842 : 842                                 | 0.9204                  | 0.0796               | 49.6368          | 0.034991                         | 0.004876                         |
| 7          | 2650 (1325:1325)                 | 1211 : 1211                               | 0.9472                  | 0.0528               | 64.2866          | 0.035309                         | 0.004183                         |
| 8          | 3650 (1825:1825)                 | 1686 : 1687                               | 0.986                   | 0.014                | 82.4477          | 0.033567                         | 0.003417                         |
| 9          | 5000 (2500:2500)                 | 2399 : 2399                               | 0.9804                  | 0.0196               | 107.912          | 0.028619                         | 0.002645                         |
| 10         | 6500 (3250:3250)                 | 3139 : 3139                               | 0.9836                  | 0.0164               | 134.781          | 0.028702                         | 0.00239                          |
| 11         | 7000 (3500:3500)                 | 3397 : 3396                               | 0.9844                  | 0.0156               | 144.551          | 0.027395                         | 0.002389                         |
| 12         | 7500 (3750:3750)                 | 3638 : 3638                               | 0.9988                  | 0.0012               | 153.349          | 0.028662                         | 0.002199                         |
| Final      | 8000 (4000:4000)                 | 4000 : 4000                               | 0.9968                  | 0.0032               | 166.774          | 0.029923                         | 0.002219                         |

Pbo = Placebo; Adr = Adrenaline

**Table A5.2.2 Example trial 2 – correct early stopping for adrenaline superior for Bayesian Design B2**

| Analysis # | Num subjects recruited (pbo:adr) | Num subjects with complete data (pbo:adr) | Pr(adrenaline superior) | Pr(placebo superior) | Duration (weeks) | Posterior Estimated response pbo | Posterior Estimated response adr |
|------------|----------------------------------|-------------------------------------------|-------------------------|----------------------|------------------|----------------------------------|----------------------------------|
| 1          | 50 (25:25)                       | 7 : 6                                     | 0.5072                  | 0.4928               | 7.82915          | 0.077761                         | 0.078654                         |
| 2          | 300 (150:150)                    | 84 : 83                                   | 0.7404                  | 0.2596               | 17.2108          | 0.042907                         | 0.057394                         |
| 3          | 600 (300:300)                    | 200 : 200                                 | 0.6496                  | 0.3504               | 23.9969          | 0.033909                         | 0.039471                         |
| 4          | 1000 (500:500)                   | 383 : 383                                 | 0.7652                  | 0.2348               | 31.4113          | 0.029442                         | 0.037607                         |
| 5          | 1450 (725:725)                   | 613 : 614                                 | 0.7212                  | 0.2788               | 40.3846          | 0.028569                         | 0.034103                         |
| 6          | 1900 (950:950)                   | 828 : 828                                 | 0.9312                  | 0.0688               | 48.6892          | 0.024418                         | 0.03606                          |
| 7          | 2650 (1325:1325)                 | 1217 : 1217                               | 0.9984                  | 0.0016               | 62.5166          | 0.021419                         | 0.040361                         |
| 8          | 3650 (1825:1825)                 | 1713 : 1713                               | 1                       | 0                    | 81.0606          | 0.020502                         | 0.039742                         |
| Final      | 3650 (1825:1825)                 | 1825 : 1825                               | 1                       | 0                    | 85.3506          | 0.020537                         | 0.039308                         |

Pbo = Placebo; Adr = Adrenaline

**Table A5.2.3 Example trial 3 – late futility (unable to declare either arm superior) for Bayesian Design B2**

| Analysis # | Num subjects recruited (pbo:adr) | Num subjects with complete data (pbo:adr) | Pr(adrenaline superior) | Pr(placebo superior) | Duration (weeks) | Posterior Estimated response pbo | Posterior Estimated response adr |
|------------|----------------------------------|-------------------------------------------|-------------------------|----------------------|------------------|----------------------------------|----------------------------------|
| 1          | 50 (25:25)                       | 5 : 4                                     | 0.3472                  | 0.6528               | 8.33206          | 0.080217                         | 0.063581                         |
| 2          | 300 (150:150)                    | 82 : 82                                   | 0.6212                  | 0.3788               | 17.6843          | 0.038318                         | 0.045343                         |
| 3          | 600 (300:300)                    | 189 : 190                                 | 0.6816                  | 0.3184               | 24.182           | 0.028795                         | 0.035579                         |
| 4          | 1000 (500:500)                   | 391 : 392                                 | 0.6504                  | 0.3496               | 32.1864          | 0.030224                         | 0.034617                         |
| 5          | 1450 (725:725)                   | 604 : 604                                 | 0.746                   | 0.254                | 40.6421          | 0.028443                         | 0.034405                         |
| 6          | 1900 (950:950)                   | 838 : 838                                 | 0.782                   | 0.218                | 49.288           | 0.025364                         | 0.031048                         |
| 7          | 2650 (1325:1325)                 | 1212 : 1212                               | 0.868                   | 0.132                | 63.3281          | 0.02398                          | 0.031243                         |
| 8          | 3650 (1825:1825)                 | 1705 : 1705                               | 0.8428                  | 0.1572               | 82.5533          | 0.023734                         | 0.029024                         |
| 9          | 5000 (2500:2500)                 | 2375 : 2375                               | 0.8716                  | 0.1284               | 108.341          | 0.024081                         | 0.029051                         |
| 10         | 6500 (3250:3250)                 | 3136 : 3137                               | 0.8232                  | 0.1768               | 136.247          | 0.023049                         | 0.026732                         |
| 11         | 7000 (3500:3500)                 | 3387 : 3386                               | 0.772                   | 0.228                | 146.008          | 0.023744                         | 0.026343                         |

|              |                  |             |        |        |         |          |          |
|--------------|------------------|-------------|--------|--------|---------|----------|----------|
| <b>12</b>    | 7500 (3750:3750) | 3629 : 3630 | 0.7648 | 0.2352 | 155.76  | 0.024624 | 0.027192 |
| <b>Final</b> | 8000 (4000:4000) | 4000 : 4000 | 0.59   | 0.41   | 168.669 | 0.025522 | 0.026439 |

Pbo = Placebo; Adr = Adrenaline

## A5.3 Bayesian Design B3

**Table A5.3.1 Example trial 1 – late declaration of adrenaline superior for Bayesian Design B3**

| Analysis #   | Num subjects recruited (pbo:adr) | Num subjects with complete data (pbo:adr) | Pr(adrenaline superior) | Pr(placebo superior) | Duration (weeks) | Posterior Estimated response pbo | Posterior Estimated response adr |
|--------------|----------------------------------|-------------------------------------------|-------------------------|----------------------|------------------|----------------------------------|----------------------------------|
| 1            | 500 (250:250)                    | 169 : 170                                 | 0.5124                  | 0.4876               | 22.7785          | 0.044554                         | 0.044855                         |
| 2            | 1000 (500:500)                   | 376 : 377                                 | 0.526                   | 0.474                | 32.221           | 0.032582                         | 0.033697                         |
| 3            | 1500 (750:750)                   | 639 : 640                                 | 0.9144                  | 0.0856               | 41.9967          | 0.022061                         | 0.033837                         |
| 4            | 2000 (1000:1000)                 | 880 : 879                                 | 0.7744                  | 0.2256               | 50.925           | 0.022876                         | 0.027999                         |
| 5            | 2500 (1250:1250)                 | 1121 : 1121                               | 0.8528                  | 0.1472               | 59.686           | 0.020182                         | 0.026063                         |
| 6            | 3000 (1500:1500)                 | 1393 : 1394                               | 0.9372                  | 0.0628               | 69.2772          | 0.016812                         | 0.024391                         |
| 7            | 3500 (1750:1750)                 | 1635 : 1634                               | 0.9696                  | 0.0304               | 78.7475          | 0.01736                          | 0.025919                         |
| 8            | 4000 (2000:2000)                 | 1891 : 1891                               | 0.9808                  | 0.0192               | 88.7248          | 0.018502                         | 0.028236                         |
| 9            | 4500 (2250:2250)                 | 2124 : 2123                               | 0.9924                  | 0.0076               | 97.3334          | 0.018896                         | 0.029434                         |
| 10           | 5000 (2500:2500)                 | 2385 : 2384                               | 0.9904                  | 0.0096               | 106.15           | 0.019186                         | 0.028967                         |
| 11           | 5500 (2750:2750)                 | 2625 : 2624                               | 0.9896                  | 0.0104               | 115.093          | 0.018792                         | 0.027503                         |
| 12           | 6000 (3000:3000)                 | 2885 : 2885                               | 0.9844                  | 0.0156               | 124.507          | 0.019165                         | 0.027627                         |
| 13           | 6500 (3250:3250)                 | 3135 va 3135                              | 0.9784                  | 0.0216               | 133.758          | 0.020962                         | 0.028579                         |
| 14           | 7000 (3500:3500)                 | 3380 : 3381                               | 0.9584                  | 0.0416               | 142.705          | 0.022185                         | 0.028905                         |
| 15           | 7500 (3750:3750)                 | 3622 : 3622                               | 0.9644                  | 0.0356               | 152.044          | 0.021798                         | 0.02852                          |
| <b>Final</b> | 8000 (4000:4000)                 | 4000 : 4000                               | 0.988                   | 0.012                | 166.359          | 0.021272                         | 0.028163                         |

Pbo = Placebo; Adr = Adrenaline

**Table A5.3.2 Example trial 2 – correct early stopping for adrenaline superior for Bayesian Design B3**

| Analysis #   | Num subjects recruited (pbo:adr) | Num subjects with complete data (pbo:adr) | Pr(adrenaline superior) | Pr(placebo superior) | Duration (weeks) | Posterior Estimated response pbo | Posterior Estimated response adr |
|--------------|----------------------------------|-------------------------------------------|-------------------------|----------------------|------------------|----------------------------------|----------------------------------|
| 1            | 500 (250:250)                    | 164 : 163                                 | 0.6056                  | 0.3944               | 22.3558          | 0.03447                          | 0.038559                         |
| 2            | 1000 (500:500)                   | 380 : 380                                 | 0.6432                  | 0.3568               | 31.6764          | 0.0277                           | 0.032008                         |
| 3            | 1500 (750:750)                   | 637 : 637                                 | 0.8168                  | 0.1832               | 40.9482          | 0.025318                         | 0.033527                         |
| 4            | 2000 (1000:1000)                 | 883 : 882                                 | 0.972                   | 0.028                | 51.0157          | 0.023852                         | 0.03819                          |
| 5            | 2500 (1250:1250)                 | 1135 : 1135                               | 0.9816                  | 0.0184               | 60.2265          | 0.020758                         | 0.033876                         |
| 6            | 3000 (1500:1500)                 | 1380 : 1381                               | 0.996                   | 0.004                | 68.9814          | 0.018799                         | 0.034846                         |
| 7            | 3500 (1750:1750)                 | 1625 : 1625                               | 1                       | 0                    | 78.6378          | 0.018472                         | 0.033847                         |
| <b>Final</b> | 3500 (1750:1750)                 | 1750 : 1750                               | 0.9876                  | 0.0124               | 82.9278          | 0.020841                         | 0.032612                         |

Pbo = Placebo; Adr = Adrenaline

**Table A5.3.3 Example trial 3 – late futility (unable to declare either arm superior) for Bayesian Design B3**

| Analysis # | Num subjects recruited (pbo:adr) | Num subjects with complete data (pbo:adr) | Pr(adrenaline superior) | Pr(placebo superior) | Duration (weeks) | Posterior Estimated response pbo | Posterior Estimated response adr |
|------------|----------------------------------|-------------------------------------------|-------------------------|----------------------|------------------|----------------------------------|----------------------------------|
| 1          | 500 (250:250)                    | 151 : 151                                 | 0.2632                  | 0.7368               | 22.2181          | 0.052038                         | 0.040395                         |
| 2          | 1000 (500:500)                   | 389 : 389                                 | 0.6476                  | 0.3524               | 32.5007          | 0.040098                         | 0.04472                          |
| 3          | 1500 (750:750)                   | 644 : 644                                 | 0.5236                  | 0.4764               | 42.3625          | 0.039668                         | 0.040303                         |
| 4          | 2000 (1000:1000)                 | 896 : 896                                 | 0.468                   | 0.532                | 53.149           | 0.0378                           | 0.037029                         |
| 5          | 2500 (1250:1250)                 | 1132 : 1132                               | 0.5792                  | 0.4208               | 61.849           | 0.033451                         | 0.034759                         |
| 6          | 3000 (1500:1500)                 | 1389 : 1388                               | 0.7532                  | 0.2468               | 70.9108          | 0.02901                          | 0.033294                         |
| 7          | 3500 (1750:1750)                 | 1638 : 1638                               | 0.892                   | 0.108                | 80.4398          | 0.025482                         | 0.032316                         |
| 8          | 4000 (2000:2000)                 | 1883 : 1883                               | 0.9244                  | 0.0756               | 89.399           | 0.024279                         | 0.031103                         |
| 9          | 4500 (2250:2250)                 | 2127 : 2127                               | 0.8884                  | 0.1116               | 98.1731          | 0.024034                         | 0.029843                         |

|              |                  |             |        |        |         |          |          |
|--------------|------------------|-------------|--------|--------|---------|----------|----------|
| <b>10</b>    | 5000 (2500:2500) | 2384 : 2385 | 0.892  | 0.108  | 107.394 | 0.022914 | 0.02822  |
| <b>11</b>    | 5500 (2750:2750) | 2635 : 2635 | 0.8428 | 0.1572 | 116.949 | 0.023261 | 0.02732  |
| <b>12</b>    | 6000 (3000:3000) | 2876 : 2876 | 0.9116 | 0.0884 | 126.103 | 0.022945 | 0.028472 |
| <b>13</b>    | 6500 (3250:3250) | 3131 : 3132 | 0.8436 | 0.1564 | 135.015 | 0.024026 | 0.027825 |
| <b>14</b>    | 7000 (3500:3500) | 3383 : 3384 | 0.8576 | 0.1424 | 144.23  | 0.024177 | 0.028346 |
| <b>15</b>    | 7500 (3750:3750) | 3630 : 3630 | 0.8212 | 0.1788 | 153.678 | 0.024223 | 0.027696 |
| <b>Final</b> | 8000 (4000:4000) | 4000 : 4000 | 0.9568 | 0.0432 | 166.868 | 0.023363 | 0.029361 |

Pbo = Placebo; Adr = Adrenaline
